# Supplementary material for: Modulating Isoprenoid Biosynthesis Increases Lipooligosaccharides and Restores Acinetobacter baumannii Resistance to Host and Antibiotic Stress
Source: PubMed Central journal article supplement — Cell Rep. Author manuscript; Available in PMC 2020 Sep 26. (PMC7519801; doi:10.1016/j.celrep.2020.108129), 2020-09-08
Supplement: NIHMS1627904-supplement-1.pdf [file NIHMS1627904-supplement-1.pdf]

Cell Reports, Volume 32

## Supplemental Information

### **Modulating Isoprenoid Biosynthesis Increases Lipooligosaccharides and Restores *Acinetobacter* *baumannii* Resistance to Host and Antibiotic Stress**

**Lauren D. Palmer, Keaton E. Minor, Joshua A. Mettlach, Emilio S. Rivera, Kelli L. Boyd, Richard M. Caprioli, Jeffrey M. Spraggins, Zachary D. Dalebroux, and Eric P. Skaar**

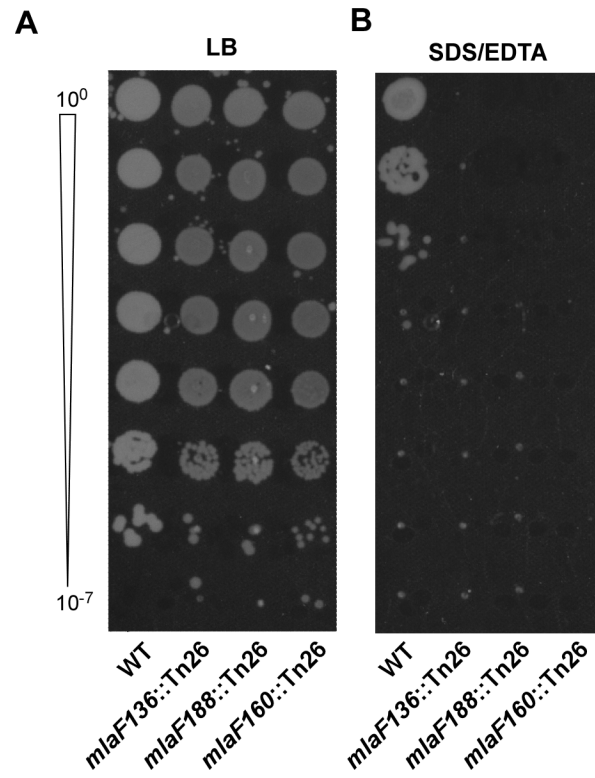

**Figure S1: *A. baumannii* AB5075 *mlaF* mutants are defective at colony formation on SDS/EDTA. Related to Figure 1.** (A-B) Wild-type (WT) and *mlaF* strains were diluted and spotted to lysogeny broth (LB) plates without (A) and with (B) 0.01% SDS and 0.15% EDTA.

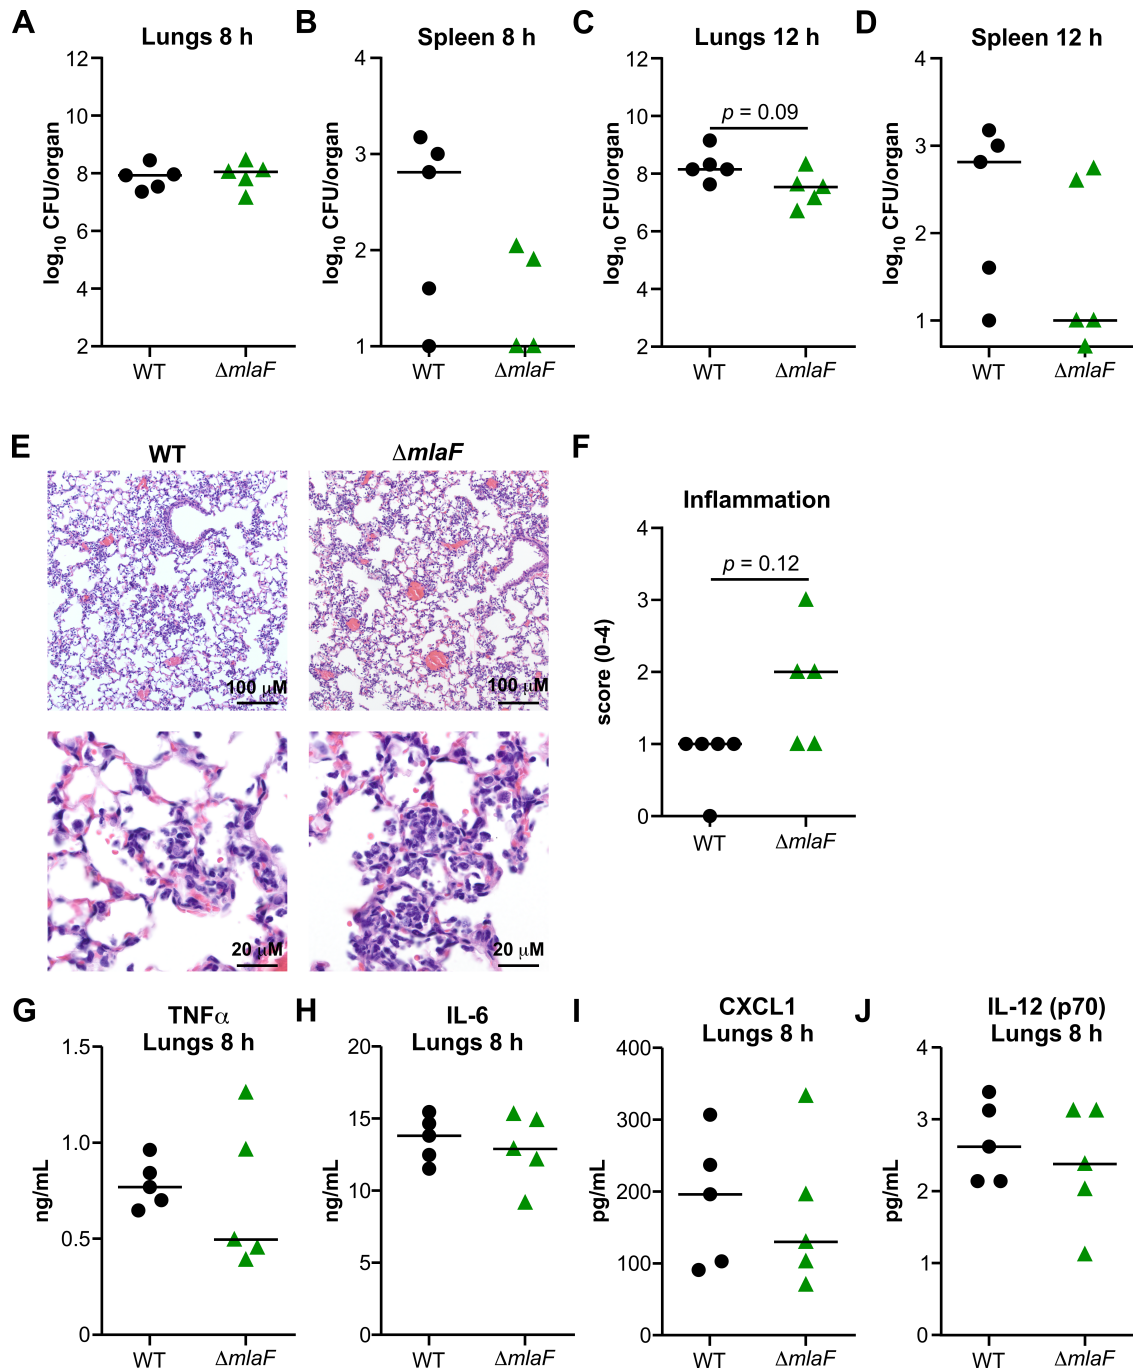

**Figure S2: Infection at 8 h, 12 h, and histology at 36 h. Related to Figure 2.** (A-B) At 8 h post infection, bacteria were enumerated from the lungs and spleens. (C-D) At 12 h post infection, bacteria were enumerated from the lungs and spleen. (E) At 8 h post infection, lungs were inflated and fixed prior to hematoxylin and eosin staining. (F) Inflammation was scored by a blinded pathologist.  $n=5$ ;  $p$  value is by Mann-Whitney test. (G-J) At 8 h post infection, cytokines and chemokines in lung homogenates were quantified by Luminex. Medians are shown. No significance by Mann-Whitney test.

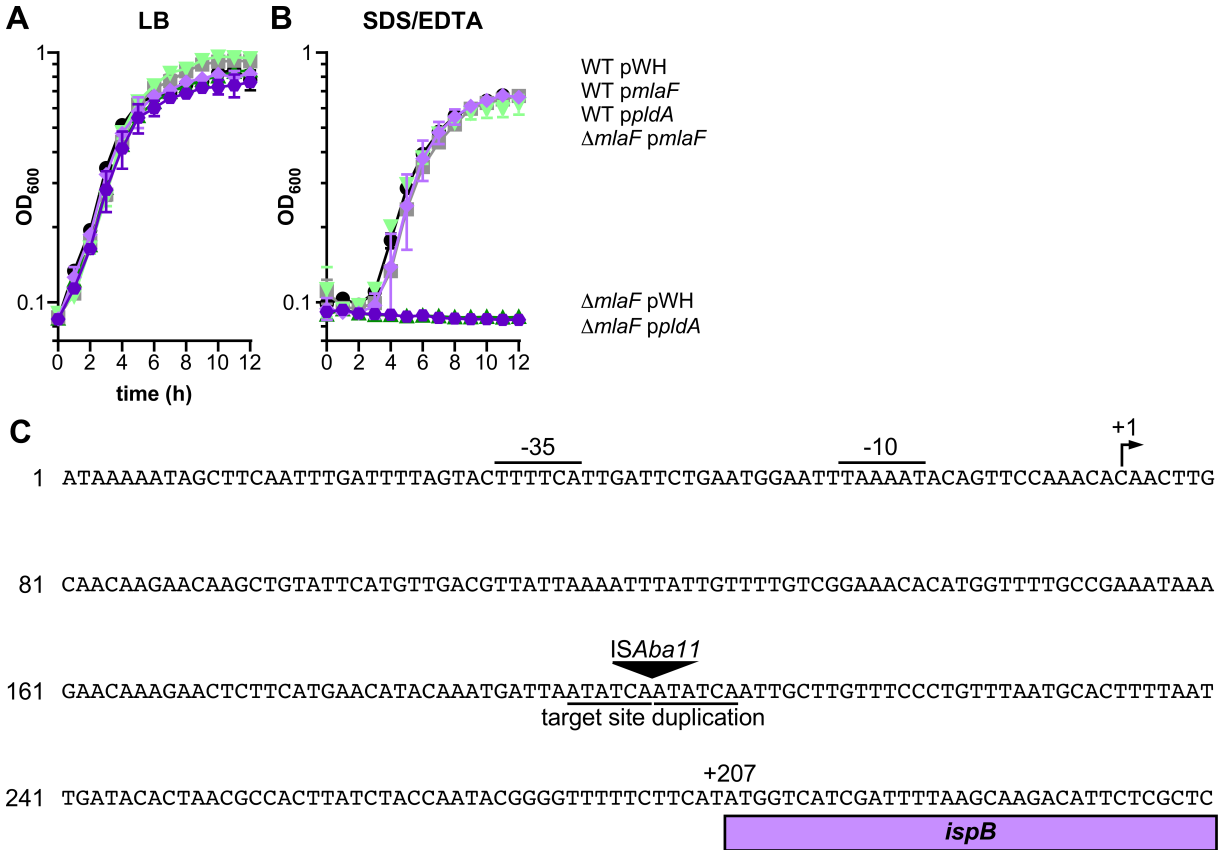

**Figure S3: Constitutive expression of *pldA* and *mlaF*, and the predicted *ispB* promoter. Related to Figure 3. (A-B) Strains constitutively expressing *pldA* or *mlaF* *in trans* were grown in lysogeny broth (LB) without (A) and with (B) 0.01% SDS and 0.15 mM EDTA (n=3). Data are mean  $\pm$  SEM. (C) Predicted *ispB* promoter region containing the IS*Aba11* insertion.**

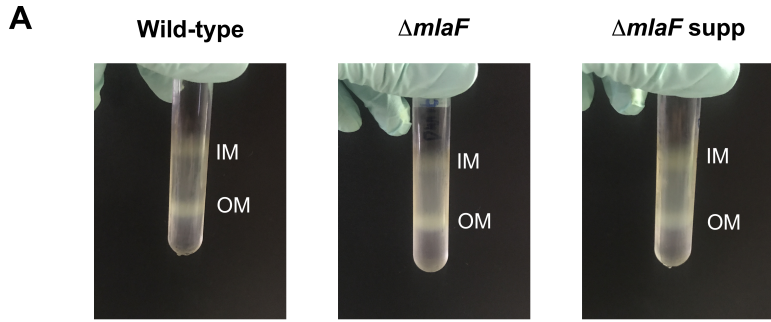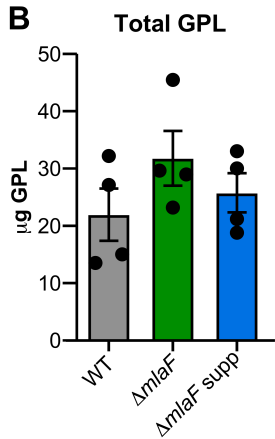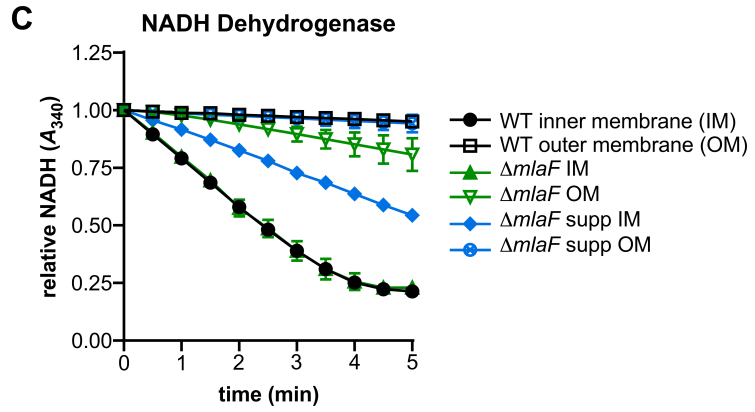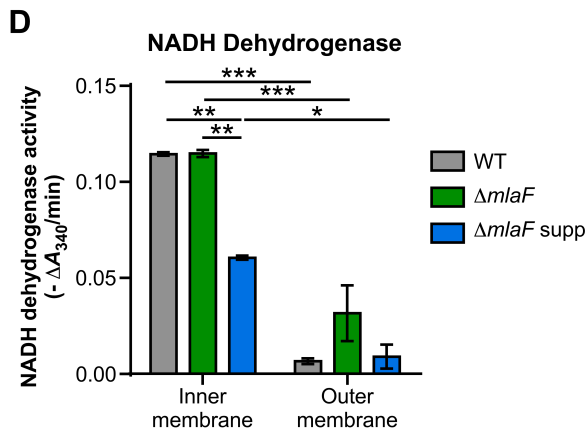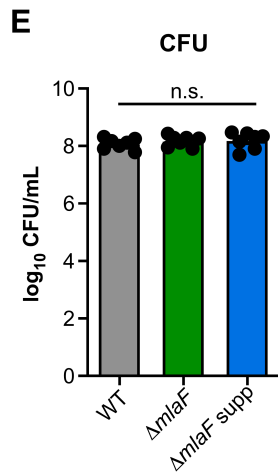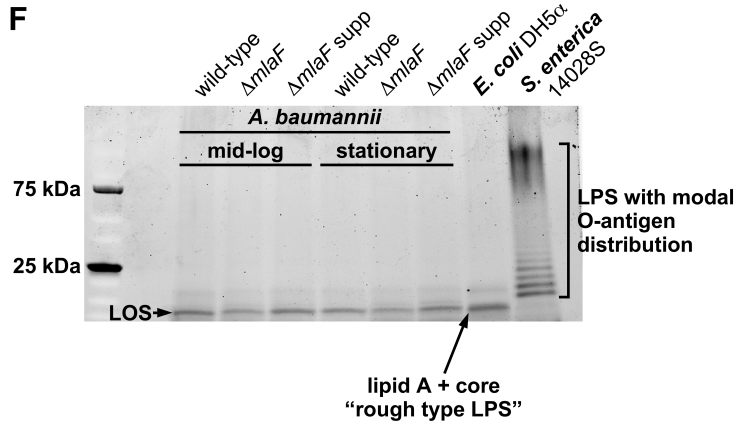

**Figure S4: Supplemental information for membrane fractionation and LOS quantification. Related to Figure 4.** (A) Membrane separation for *A. baumannii*. (B) Total glycerophospholipids (GPL) (n=4; significance is by one-way ANOVA with Tukey's multiple comparisons). (C) NADH dehydrogenase assay for inner membrane (IM; filled symbols) and outer membrane (OM; open symbols) fractions measured decrease in NADH by absorbance at 340 nm using 50 µg total protein and normalized to time = 0 s (n=2). (D) NADH dehydrogenase activity was determined by initial rate (n=2; significance is determined by two-way ANOVA with Tukey's multiple comparisons). (E) CFU quantification of samples used for LOS analysis (n=7; no significance by one-way ANOVA). (F) Representative gel showing LOS and LPS from *A. baumannii* strains, *E. coli* DH5α, and *S. enterica* serovar Typhimurium 14028S. Data are mean ± SEM. \*  $p < 0.05$ , \*\*  $p < 0.01$ , \*\*\*  $p < 0.001$ , \*\*\*\*  $p < 0.0001$ .

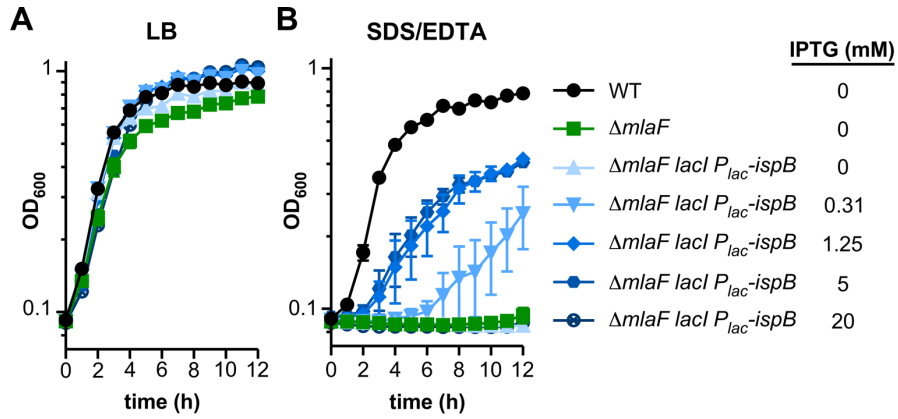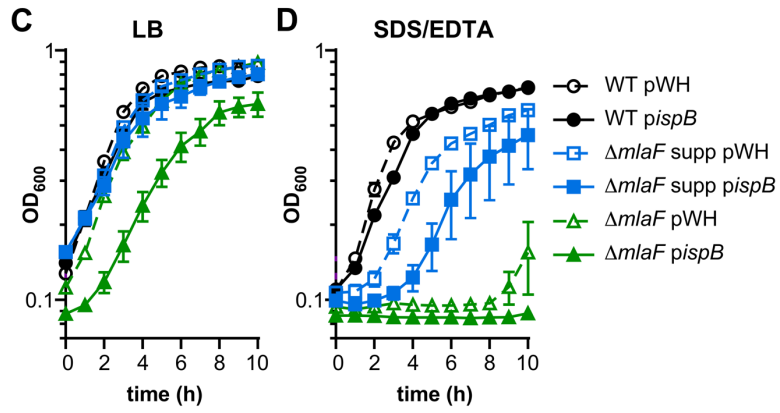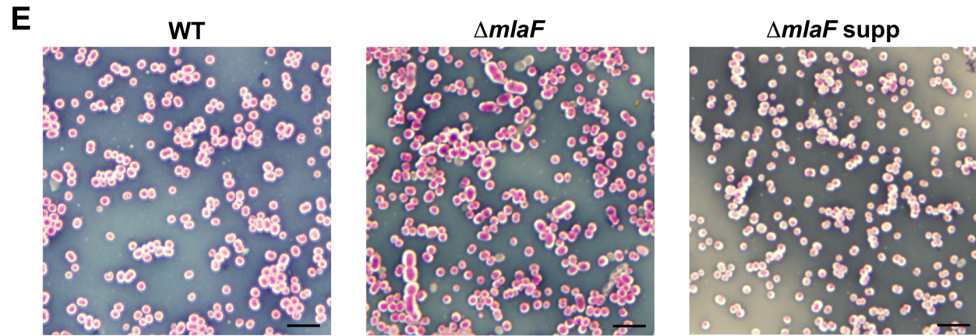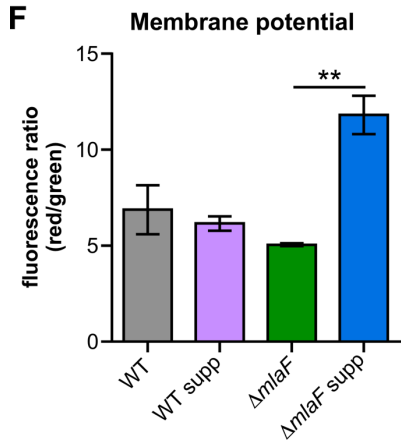

**Figure S5: Additional characterization of  $\Delta mlaF$  suppressor strain phenotypes. Related to Figure 5.** (A-B) Representative growth curves of the inducible *ispB*  $\Delta mlaF$  strain in LB without (A) and with (B) 0.01% SDS and 0.175 mM EDTA (n=2). (C-D) Representative growth curves of strains constitutively expressing *ispB* in trans (filled symbols) in LB without (C) and with (D) 0.01% SDS and 0.1 mM EDTA (n=3). (E) Congo red exclusion to visualize capsule. Scale bar is 5  $\mu$ m. (F) Membrane potential was assessed in mid-logarithmic growth in LB (n=2-3, significance is by one-way ANOVA with Tukey's multiple comparisons). Data are mean  $\pm$  SEM. \*\*  $p < 0.01$ .



**Table S1: Glycerophospholipids in the total membranes. Related to Figure 4.** Data represent four biological replicates and significance was determined by 2-way ANOVA with Dunnett's multiple comparisons test. Data are mean  $\pm$  standard deviation in ng GPL/extraction (normalized to 1.5 mg protein). Significance is denoted compared to wild-type as \*  $p < 0.05$ , \*\*  $p < 0.01$ , \*\*\*  $p < 0.001$ ; there were no statistically significant differences between  $\Delta mlaF$  and  $\Delta mlaF$  suppressor (supp) by 2-way ANOVA with Tukey's multiple comparisons test. GPL: glycerophospholipid; PGL: phosphatidylglycerol; aPGL: acyl-phosphatidylglycerol; PE: phosphatidylethanolamine; CL: cardiolipin.

| GPL species           | Total membranes  |                    |                    |
|-----------------------|------------------|--------------------|--------------------|
|                       | Wild-type        | $\Delta mlaF$      | $\Delta mlaF$ supp |
| PGL $m/z$ 719 > 253   | 1317 $\pm$ 492   | 5256 $\pm$ 1642*** | 4276 $\pm$ 1227**  |
| PGL $m/z$ 747 > 281   | 4861 $\pm$ 2016  | 5983 $\pm$ 1575    | 5668 $\pm$ 1473    |
| PGL $m/z$ 773 > 281   | 2062 $\pm$ 1407  | 2116 $\pm$ 1286    | 1603 $\pm$ 871     |
| aPGL $m/z$ 955 > 253  | 2 $\pm$ 2        | 19 $\pm$ 14        | 10 $\pm$ 3         |
| aPGL $m/z$ 958 > 255  | 10 $\pm$ 4       | 91 $\pm$ 36        | 78 $\pm$ 10        |
| aPGL $m/z$ 986 > 255  | 172 $\pm$ 88     | 384 $\pm$ 124      | 427 $\pm$ 153      |
| aPGL $m/z$ 1012 > 255 | 36 $\pm$ 25      | 82 $\pm$ 52        | 55 $\pm$ 22        |
| PE $m/z$ 688 > 253    | 88 $\pm$ 43      | 486 $\pm$ 39       | 324 $\pm$ 120      |
| PE $m/z$ 716 > 281    | 10419 $\pm$ 4055 | 13238 $\pm$ 3007** | 11104 $\pm$ 2912   |
| PE $m/z$ 742 > 281    | 1760 $\pm$ 1264  | 2980 $\pm$ 2588    | 1568 $\pm$ 905     |
| CL $m/z$ 1402 > 255   | 1244 $\pm$ 881   | 1179 $\pm$ 475     | 657 $\pm$ 504      |

**Table S2: Glycerophospholipids in the outer membrane fraction. Related to Figure 4.** Data represent three biological replicates and significance was determined by 2-way ANOVA with Dunnett's multiple comparisons test. Data are mean  $\pm$  standard deviation in ng GPL/extraction (normalized to 0.5 mg protein). Significance is denoted compared to wild-type as \*  $p < 0.05$ ; there were no statistically significant differences between  $\Delta mlaF$  and  $\Delta mlaF$  suppressor (supp) by 2-way ANOVA with Tukey's multiple comparisons test. GPL: glycerophospholipid; PGL: phosphatidylglycerol; aPGL: acyl-phosphatidylglycerol; PE: phosphatidylethanolamine; CL: cardiolipin.

| GPL species           | Total membranes   |                   |                    |
|-----------------------|-------------------|-------------------|--------------------|
|                       | Wild-type         | $\Delta mlaF$     | $\Delta mlaF$ supp |
| PGL $m/z$ 719 > 253   | 82.1 $\pm$ 35.5   | 295.7 $\pm$ 61.7* | 254.6 $\pm$ 83.3*  |
| PGL $m/z$ 747 > 281   | 613.4 $\pm$ 246.4 | 659.9 $\pm$ 134.3 | 565.5 $\pm$ 158.2  |
| PGL $m/z$ 773 > 281   | 139.9 $\pm$ 10.5  | 130.7 $\pm$ 86.8  | 63.7 $\pm$ 34.4    |
| aPGL $m/z$ 955 > 253  | 0.2 $\pm$ 0.1     | 1.2 $\pm$ 0.5     | 0.7 $\pm$ 0.1      |
| aPGL $m/z$ 958 > 255  | 1.8 $\pm$ 0.2     | 10.4 $\pm$ 3.2    | 8 $\pm$ 3.8        |
| aPGL $m/z$ 986 > 255  | 15.3 $\pm$ 3.6    | 30.1 $\pm$ 5.1    | 29.4 $\pm$ 6.9     |
| aPGL $m/z$ 1012 > 255 | 4.3 $\pm$ 1.2     | 7.6 $\pm$ 2.3     | 5.4 $\pm$ 1.4      |
| PE $m/z$ 688 > 253    | 1.9 $\pm$ 1.2     | 11.7 $\pm$ 0.8    | 9.2 $\pm$ 6        |
| PE $m/z$ 716 > 281    | 335.3 $\pm$ 165.7 | 451.6 $\pm$ 158.4 | 400.7 $\pm$ 161.8  |
| PE $m/z$ 742 > 281    | 62.3 $\pm$ 23.3   | 66 $\pm$ 25       | 58.1 $\pm$ 9.1     |
| CL $m/z$ 1402 > 255   | 450.8 $\pm$ 182.1 | 377.1 $\pm$ 151.1 | 328.5 $\pm$ 150.2  |

**Table S3: Oligonucleotides used in this study. Related to STAR Methods section.**

| Sequence                                                     | Source               | Identifier |
|--------------------------------------------------------------|----------------------|------------|
| CCCGGGTCTGAAATTGAAGGC                                        | IDT (Coralville, IA) | BM17       |
| CCTAGTTAGTCACATATGATTATTCATAATGGCAATCA                       | IDT (Coralville, IA) | BM18       |
| GAATAATGACATATGCGTCCATGAATACGATTG                            | IDT (Coralville, IA) | BM19       |
| CCCGGGATCAGTTGCTGTTC                                         | IDT (Coralville, IA) | BM20       |
| TGATTGCCATTATGAATAATCATATGTGACTAACTAGGAG<br>GA               | IDT (Coralville, IA) | BM21       |
| CAATCGTATTCATGGACGCATATGTCATTATTCCTCC                        | IDT (Coralville, IA) | BM22       |
| CGAGGGGAACGCGTCATTT                                          | IDT (Coralville, IA) | LP63       |
| GCTCCACTCTGGAACAGCATTC                                       | IDT (Coralville, IA) | LP64       |
| GGTCGTACAGGTCGTGC                                            | IDT (Coralville, IA) | LP69       |
| AGACCACCACCCGGTAC                                            | IDT (Coralville, IA) | LP70       |
| AAAGGATCCTTTAAGAGATTTAAAAAAGGCC                              | IDT (Coralville, IA) | LP71       |
| AAAGTCGACTCATGGACGAACCTCG                                    | IDT (Coralville, IA) | LP72       |
| CACACCCGTCCTGTGGATCCGCGTGACAAAAGAGATAT<br>G                  | IDT (Coralville, IA) | LP127      |
| TGAACGCCATCTCGAGGATATACCTGATAAAGTCAGCG                       | IDT (Coralville, IA) | LP143      |
| CAGGTATATCCTCGAGATGGCGTTCAGACAATTTG                          | IDT (Coralville, IA) | LP144      |
| AAGGCTCTCAAGGGCATCGGTTCGACGGTACCTTAGTAC<br>CAGTTCATGAGTG     | IDT (Coralville, IA) | LP145      |
| GTATATCCTCGAGATATGGTACCGTCGACC                               | IDT (Coralville, IA) | LP148      |
| ATACTCGAGATGAATAATAAACTCCTCTCTCG                             | IDT (Coralville, IA) | LP146      |
| AAAGGTACCTCATGGACGAACCTCG                                    | IDT (Coralville, IA) | LP147      |
| ACCGCTGACTTTATCAGGTATATCCTCGAGATGGTCATC<br>GATTTTAAGCAAG     | IDT (Coralville, IA) | LP246      |
| TCTCAAGGGCATCGGTTCGACGGTACCCTACTGTATTCTGA<br>TGTAATGCAAG     | IDT (Coralville, IA) | LP247      |
| GGCGCAAGGGCTGCTAAAGGCGTCAGGCTGTCCATGCC                       | IDT (Coralville, IA) | LP258      |
| TTCGAACCCAGAGTCCCCTCACAATGAAGTTGCGAAT<br>GG                  | IDT (Coralville, IA) | LP259      |
| GTTAAAAAGGATCGATCCTCTAGAGGATCCAAATTGACC<br>TTTCACTTC         | IDT (Coralville, IA) | LP270      |
| ACTTCGAAGCAGCTCCAGCCTACACATGAAGAAAAACCC<br>CGTATTG           | IDT (Coralville, IA) | LP271      |
| AGGAACTAAGGAGGATATTCATATGATATTATTTTGCCTA<br>TGCATATAAATTTTTC | IDT (Coralville, IA) | LP272      |
| ATGATTACGAATTCGAGCTCGGTACCAATAAGCTCACTG<br>GTCGTG            | IDT (Coralville, IA) | LP273      |
| TATACATGCCCAAAGCC                                            | IDT (Coralville, IA) | LP275      |
| CATGCATGAGCTCACTAGTGGATCCTCACTGCCCGCTTT<br>CCAG              | IDT (Coralville, IA) | LP342      |

|                                                       |                      |       |
|-------------------------------------------------------|----------------------|-------|
| AGGTACCGGGCCCAAGCTTCTCGAGCTACTGTATTCGAT<br>GTAATGCAAG | IDT (Coralville, IA) | LP345 |
| GCGCTTTTGAAGCTAATTCG                                  | IDT (Coralville, IA) | LP354 |
| ATTTCACTTATCTGGTTGGCC                                 | IDT (Coralville, IA) | LP355 |
| CGATGACCATGAGCTCGAATTCTGTTTCCTG                       | IDT (Coralville, IA) | LP356 |
| ATTCGAGCTCATGGTCATCGATTTTAAGC                         | IDT (Coralville, IA) | LP357 |
| CAGTTTCAACTTTTACGTAGCGAC                              | IDT (Coralville, IA) | LP358 |
